# Supplementary material for: A Combined Molecular Dynamics and Hydropathic INTeraction (HINT) Approach to Investigate Protein Flexibility: The PPARγ Case Study
Source: MDPI journal article supplement (doi:10.3390/molecules29102234), 2024-05-10
Supplement: s1 [file s1]

**Table of Contents**

|                                                                    |    |
|--------------------------------------------------------------------|----|
| <b>Table S1.</b> PPAR $\gamma$ vs Estrogen Receptor Binding pocket | S1 |
| <b>Table S2.</b> Protein RMSD values                               | S2 |
| <b>Figure S1.</b> Ligand RMSD profile                              | S3 |
| <b>Table S3.</b> Ligand RMSD values                                | S4 |
| <b>Figure S2.</b> HINTscore profiles                               | S5 |
| <b>Figure S3.</b> HintTable output files                           | S6 |

*Table S1 PPAR $\gamma$  (PDB ID: 1FM6) active site characteristics compared to Estrogen Receptor alpha (ER $\alpha$ ) (PDB ID: 2YJA). The analysis was carried out in Fpocket using the default parameters settings and reveals a significant PPAR $\gamma$  active site higher volume and flexibility*

| Parameters           | Score (PPAR $\gamma$ ) | Score (ER $\alpha$ ) |
|----------------------|------------------------|----------------------|
| Volume               | 1413.471               | 493.171              |
| Total SASA           | 261.473                | 98.965               |
| Polar SASA           | 96.962                 | 62.499               |
| Apolar SASA          | 164.475                | 36.466               |
| Hydrophobicity Score | 48.681                 | 33.960               |
| Polarity Score       | 17                     | 5                    |
| Charge Score         | 2                      | 1                    |
| Flexibility Score    | 0.431                  | 0.150                |

*Table S2 Protein RMSD values. The average protein backbone RMSD values for the PPAR $\gamma$  – Rosiglitazone and the PPAR $\gamma$  – Rosiglitazone – Oleic Acid complexes show a high stability of both system over time in all three produced trajectories*

|                              | PPAR $\gamma$ - Rosiglitazone | PPAR $\gamma$ – Rosiglitazone – Oleic Acid |
|------------------------------|-------------------------------|--------------------------------------------|
| RMSD Protein C $\alpha$ Run1 | 2,60 $\pm$ 0,12               | 2,14 $\pm$ 0,20                            |
| RMSD Protein C $\alpha$ Run2 | 2,24 $\pm$ 0,17               | 1,74 $\pm$ 0,17                            |
| RMSD Protein C $\alpha$ Run3 | 2,20 $\pm$ 0,31               | 1,62 $\pm$ 0,16                            |

*Figure S1 Ligand RMSD profile. The stability of Rosiglitazone and Oleic Acid was evaluated by computing the RMSD values during the simulation time for all three independent replicas (run1 in blue, run2 in orange and run3 in grey) Both ligands remain stable during the simulation time thanks to the intensive interaction network with residues in the orthosteric and alternate sites. Figure S1A shows the Rosiglitazone RMSD profile in the PPAR $\gamma$  – Rosiglitazone complex, while Figure S1B and Figure S1C the Rosiglitazone and the Oleic Acid RMSD profile in the PPAR $\gamma$  – Rosiglitazone – Oleic Acid complex.*

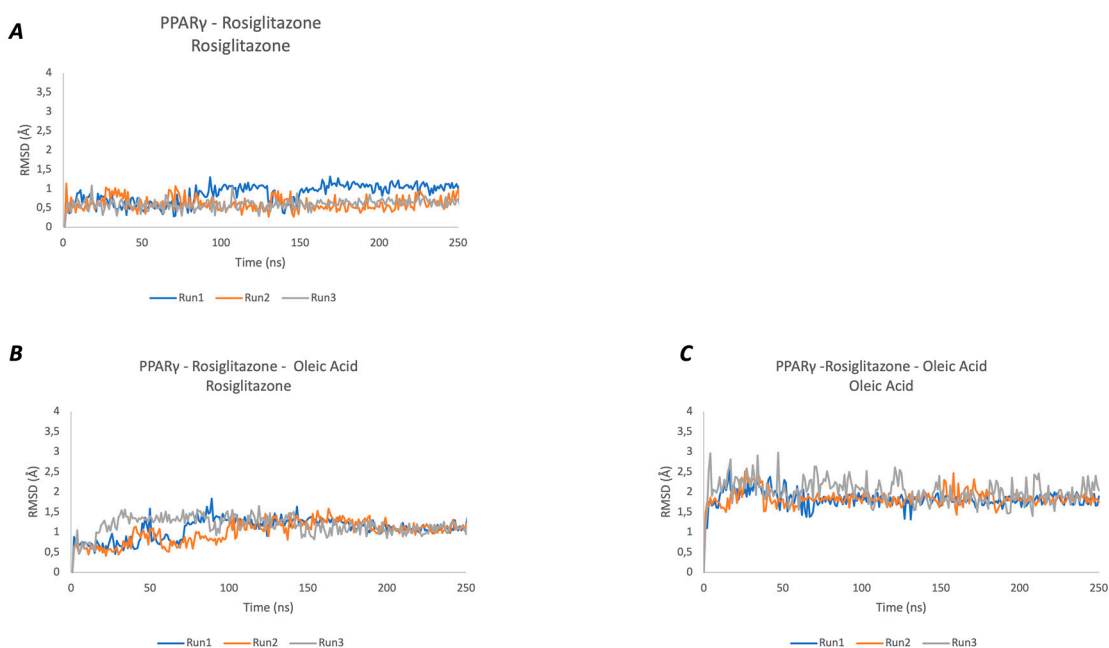

*Table S3 Ligand RMSD values. The average ligand heavy atoms RMSD values for the PPAR $\gamma$  – Rosiglitazone and the PPAR $\gamma$  – Rosiglitazone – Oleic Acid complexes show a high stability of both ligand over time in all three produced trajectories*

|                    | PPAR $\gamma$ - Rosiglitazone | PPAR $\gamma$ – Rosiglitazone – Oleic Acid |
|--------------------|-------------------------------|--------------------------------------------|
| Rosiglitazone Run1 | 0,86 $\pm$ 0,25               | 1,08 $\pm$ 0,26                            |
| Rosiglitazone Run2 | 0,61 $\pm$ 0,17               | 1,01 $\pm$ 0,27                            |
| Rosiglitazone Run3 | 0,60 $\pm$ 0,12               | 1,17 $\pm$ 0,23                            |
| Oleic Acid Run1    |                               | 1,83 $\pm$ 0,22                            |
| Oleic Acid Run2    |                               | 1,84 $\pm$ 0,22                            |
| Oleic Acid Run3    |                               | 2,02 $\pm$ 0,32                            |

Figure S2 HINTscore values for for the PPARY – Rosiglitazone (A) and the PPARY – Rosiglitazone – Oleic Acid (B) complexes over time in all three produced trajectories. The total HINT score and Hydrogen bond, Electrostatic and Hydrophobic contributions are represented as green, orange, grey and yellow lines, respectively

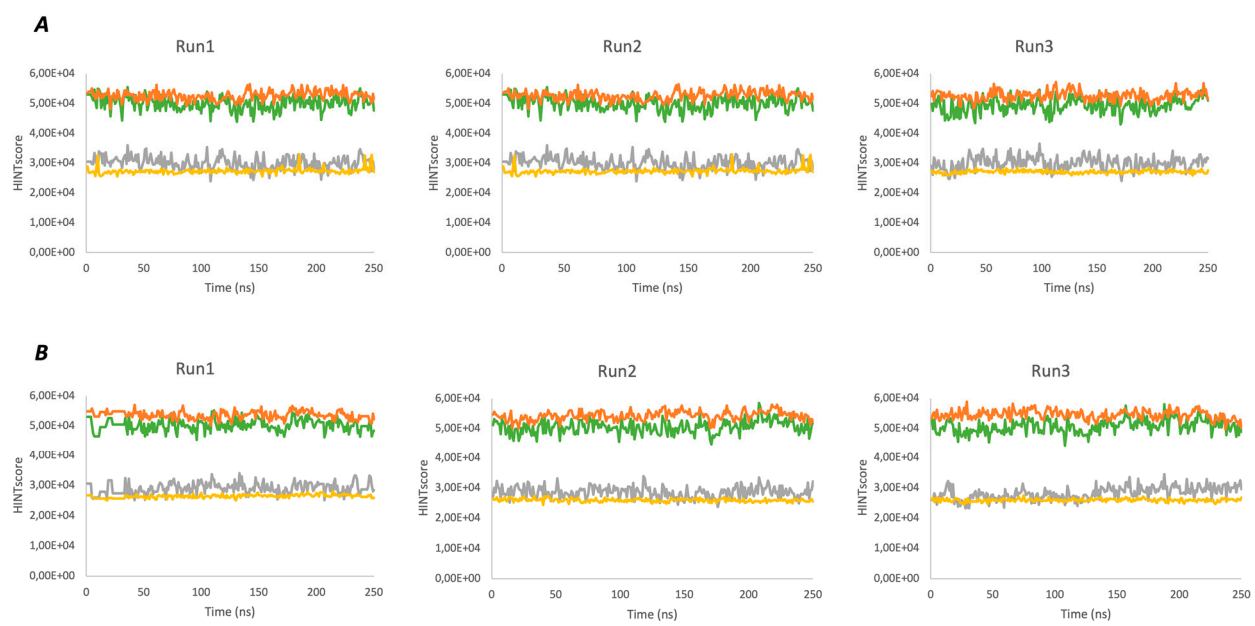

Figure S3 HintTable output file. The HINT output file is a table that lists and describes all intramolecular interactions occurring by interacting atom pairs. The analysis of the output files (PPARy-Rosiglitazone complex in A and PPARy-Rosiglitazone-Oleic Acid in B) underlines a different intramolecular interactions pattern involving  $\omega$ -loop residues. The Oleic Acid binding to the alternate site triggers a protein conformation change that involves both  $\omega$ -loop and helix H3 residues with a significant stabilization effect.

#### A PPARy-Rosiglitazone System

| Monomer Type | Monomer Name | Atom Name | Atom Type | Hydrophobic Atom Const. | SASA  | Monomer Type | Monomer Name | Atom Name | Atom Type | Hydrophobic Atom Const. | SASA  | Distance Angstroms | VDW    | Interaction Score | Interaction Type |
|--------------|--------------|-----------|-----------|-------------------------|-------|--------------|--------------|-----------|-----------|-------------------------|-------|--------------------|--------|-------------------|------------------|
| ILE          | 267          | CB        | C:3:1     | 0.220                   | 6.00  | THR          | 268          | N         | N.am      | -0.224                  | 32.00 | 3.709              | 114.14 | 6                 | Hydroph./Polar   |
| THR          | 268          | O         | O:2       | -1.915                  | 26.00 | LEU          | 270          | N         | N.am      | -0.703                  | 32.00 | 3.497              | 114.67 | 34                | Hydrogen Bond    |
| PRO          | 269          | C         | C:co      | 1.642                   | 1.00  | LEU          | 270          | CB        | C:3:2     | 0.520                   | 23.00 | 3.579              | 105.26 | 3                 | Hydrophobic      |
| PRO          | 269          | C         | C:co      | 1.642                   | 1.00  | LEU          | 270          | CD2       | C:3:3     | 0.820                   | 65.00 | 4.002              | 117.69 | 3                 | Hydrophobic      |
| LEU          | 270          | N         | N.am      | -0.703                  | 32.00 | GLN          | 271          | CA        | C:3       | 0.190                   | 12.00 | 4.292              | 132.07 | 12                | Hydroph./Polar   |
| GLU          | 272          | OE1       | O:co2     | -3.310                  | 36.00 | SER          | 274          | N         | N.am      | -0.224                  | 32.00 | 3.666              | 120.21 | 114               | Hydrogen Bond    |
| GLU          | 272          | OE2       | O:co2     | -3.310                  | 36.00 | GLN          | 273          | N         | N.am      | -0.519                  | 32.00 | 3.853              | 126.31 | 62                | Hydrogen Bond    |
| GLU          | 272          | N         | N.am      | -0.519                  | 31.00 | ARG          | 280          | NH2       | N:pl3     | -1.540                  | 49.00 | 5.307              | 171.18 | -10               | Acid/Acid        |
| GLU          | 272          | N         | N.am      | -0.519                  | 31.00 | GLN          | 273          | N         | N.am      | -0.519                  | 32.00 | 2.862              | 92.32  | -19               | Acid/Acid        |
| LYS          | 275          | N         | N.am      | -0.334                  | 32.00 | GLU          | 276          | N         | N.am      | -0.519                  | 31.00 | 2.794              | 90.14  | -31               | Acid/Acid        |
| GLU          | 276          | OE1       | O:co2     | -3.310                  | 36.00 | ARG          | 357          | NH1       | N:pl3     | -1.540                  | 49.00 | 5.045              | 165.40 | 13                | Acid/Base        |
| GLU          | 276          | OE1       | O:co2     | -3.310                  | 36.00 | ARG          | 357          | NH2       | N:pl3     | -1.540                  | 49.00 | 3.042              | 99.73  | 264               | Hydrogen Bond    |
| GLU          | 276          | OE2       | O:co2     | -3.310                  | 36.00 | ALA          | 278          | N         | N.am      | -0.703                  | 32.00 | 2.993              | 98.15  | 265               | Hydrogen Bond    |
| GLU          | 276          | OE2       | O:co2     | -3.310                  | 36.00 | ALA          | 278          | CB        | C:3:3     | 0.810                   | 75.00 | 3.403              | 106.35 | -163              | Hydroph./Polar   |
| PHE          | 282          | CB        | C:3:2     | 0.489                   | 29.00 | ILE          | 456          | CD1       | C:3:3     | 0.820                   | 74.00 | 5.594              | 164.54 | 4                 | Hydrophobic      |
| PHE          | 282          | CD1       | C:ar      | 0.355                   | 19.00 | CYS          | 285          | CB        | C:3:1     | 0.489                   | 30.00 | 5.061              | 148.87 | 3                 | Hydrophobic      |
| PHE          | 282          | CD1       | C:ar      | 0.355                   | 19.00 | LEU          | 452          | CD2       | C:3:3     | 0.820                   | 65.00 | 4.520              | 132.94 | 3                 | Hydrophobic      |
| PHE          | 282          | CE1       | C:ar      | 0.355                   | 36.00 | GLN          | 286          | CG        | C:3:2     | 0.500                   | 35.00 | 4.451              | 130.90 | 2                 | Hydrophobic      |
| PHE          | 282          | CE1       | C:ar      | 0.355                   | 36.00 | LEU          | 452          | CD2       | C:3:3     | 0.820                   | 65.00 | 4.218              | 124.06 | 6                 | Hydrophobic      |
| PHE          | 282          | CE1       | C:ar      | 0.355                   | 36.00 | LEU          | 453          | CD2       | C:3:3     | 0.820                   | 65.00 | 4.881              | 143.55 | 3                 | Hydrophobic      |
| PHE          | 282          | CZ        | C:ar      | 0.355                   | 40.00 | GLN          | 286          | CG        | C:3:2     | 0.500                   | 35.00 | 4.578              | 134.65 | 2                 | Hydrophobic      |

#### B PPARy-Rosiglitazone-Oleic Acid System

| Monomer Type | Monomer Name | Atom Name | Atom Type | Hydrophobic Atom Const. | SASA  | Monomer Type | Monomer Name | Atom Name | Atom Type | Hydrophobic Atom Const. | SASA  | Distance Angstroms | VDW    | Interaction Score | Interaction Type |
|--------------|--------------|-----------|-----------|-------------------------|-------|--------------|--------------|-----------|-----------|-------------------------|-------|--------------------|--------|-------------------|------------------|
| LYS          | 265          | OX2       | O:co2     | -3.310                  | 45.00 | ILE          | 267          | N         | N.am      | -0.703                  | 31.00 | 3.376              | 110.68 | 80                | Hydrogen Bond    |
| LYS          | 265          | OX2       | O:co2     | -3.310                  | 45.00 | THR          | 268          | N         | N.am      | -0.224                  | 32.00 | 4.243              | 139.12 | 27                | Acid/Base        |
| ILE          | 267          | CA        | C:3       | 0.220                   | 9.00  | ILE          | 281          | CD1       | C:3:3     | 0.820                   | 74.00 | 4.025              | 118.38 | 6                 | Hydrophobic      |
| ILE          | 267          | CG2       | C:3:3     | 0.820                   | 53.00 | THR          | 268          | CG2       | C:3:3     | 0.810                   | 67.00 | 4.436              | 130.48 | 29                | Hydrophobic      |
| PRO          | 269          | CD        | C:3:1     | 0.588                   | 30.00 | GLU          | 272          | CG        | C:3:2     | 0.500                   | 38.00 | 4.812              | 141.52 | 3                 | Hydrophobic      |
| PRO          | 269          | CD        | C:3:1     | 0.588                   | 30.00 | GLN          | 273          | CA        | C:3       | 0.190                   | 12.00 | 5.074              | 149.23 | 3                 | Hydrophobic      |
| LEU          | 270          | N         | N.am      | -0.703                  | 32.00 | GLN          | 271          | CA        | C:3       | 0.190                   | 12.00 | 4.292              | 132.07 | 3                 | Hydroph./Polar   |
| GLU          | 272          | OE1       | O:co2     | -3.310                  | 36.00 | GLN          | 283          | NE2       | N:pl3     | -1.540                  | 49.00 | 2.773              | 90.91  | 344               | Hydrogen Bond    |
| GLU          | 272          | O         | O:2       | -1.915                  | 23.00 | SER          | 274          | N         | N.am      | -0.224                  | 32.00 | 3.174              | 104.05 | 45                | Hydrogen Bond    |
| GLU          | 272          | O         | O:2       | -1.915                  | 23.00 | LYS          | 275          | N         | N.am      | -0.334                  | 32.00 | 3.209              | 105.22 | 95                | Hydrogen Bond    |
| LYS          | 275          | NZ        | N:4:3     | -2.214                  | 61.00 | GLN          | 283          | OE1       | O:2       | -1.915                  | 40.00 | 3.018              | 98.95  | 405               | Hydrogen Bond    |
| LYS          | 275          | NZ        | N:4:3     | -2.214                  | 61.00 | ASP          | 462          | OD2       | O:co2     | -3.310                  | 36.50 | 5.161              | 169.20 | 64                | Acid/Base        |
| LYS          | 275          | NZ        | N:4:3     | -2.214                  | 61.00 | ASP          | 462          | O         | O:2       | -1.915                  | 25.00 | 2.799              | 91.76  | 290               | Acid/Base        |
| GLU          | 276          | O         | O:2       | -1.915                  | 23.00 | ILE          | 279          | N         | N.am      | -0.703                  | 31.00 | 3.261              | 107.58 | 60                | Hydrogen Bond    |
| GLU          | 276          | O         | O:2       | -1.915                  | 23.00 | ARG          | 280          | N         | N.am      | -0.297                  | 32.00 | 2.818              | 92.39  | 122               | Hydrogen Bond    |
| PHE          | 282          | CZ        | C:ar      | 0.355                   | 40.00 | LEU          | 356          | CD1       | C:3:3     | 0.820                   | 66.00 | 4.030              | 118.53 | 13                | Hydrophobic      |
| PHE          | 282          | CZ        | C:ar      | 0.355                   | 40.00 | LEU          | 356          | CD2       | C:3:3     | 0.820                   | 65.00 | 4.282              | 125.94 | 9                 | Hydrophobic      |
| PHE          | 282          | CZ        | C:ar      | 0.355                   | 40.00 | ILE          | 456          | CD1       | C:3:3     | 0.820                   | 74.00 | 3.853              | 113.34 | 9                 | Hydrophobic      |
| PHE          | 282          | CE2       | C:ar      | 0.355                   | 38.00 | LEU          | 356          | CD2       | C:3:3     | 0.820                   | 65.00 | 4.938              | 145.25 | 15                | Hydrophobic      |
| PHE          | 282          | CE2       | C:ar      | 0.355                   | 38.00 | ILE          | 456          | CG2       | C:3:3     | 0.820                   | 53.00 | 4.042              | 118.88 | 6                 | Hydrophobic      |
| PHE          | 282          | CE2       | C:ar      | 0.355                   | 38.00 | ILE          | 456          | CG1       | C:3:2     | 0.520                   | 27.00 | 4.283              | 125.97 | 3                 | Hydrophobic      |
| PHE          | 282          | CE2       | C:ar      | 0.355                   | 38.00 | ILE          | 456          | CD1       | C:3:3     | 0.820                   | 74.00 | 3.768              | 110.82 | 9                 | Hydrophobic      |
| PHE          | 282          | CD2       | C:ar      | 0.355                   | 18.00 | ILE          | 456          | CG2       | C:3:3     | 0.820                   | 53.00 | 3.401              | 100.03 | 11                | Hydrophobic      |
| PHE          | 282          | CD2       | C:ar      | 0.355                   | 18.00 | ILE          | 456          | CD1       | C:3:3     | 0.820                   | 74.00 | 3.974              | 116.87 | 5                 | Hydrophobic      |
| ILE          | 281          | CG2       | C:3:3     | 0.820                   | 53.00 | PHE          | 282          | CB        | C:3:2     | 0.489                   | 29.00 | 5.496              | 161.65 | 3                 | Hydrophobic      |
| ILE          | 281          | CG2       | C:3:3     | 0.820                   | 53.00 | PHE          | 282          | CE2       | C:ar      | 0.355                   | 38.00 | 4.872              | 143.30 | 3                 | Hydrophobic      |
| ILE          | 281          | CG2       | C:3:3     | 0.820                   | 53.00 | PHE          | 282          | CD2       | C:ar      | 0.355                   | 18.00 | 4.492              | 132.12 | 4                 | Hydrophobic      |
